# Supplementary material for: The effect of mind- and body-based interventions on poststroke depression and its neural mechanisms: A systematic review and meta-analysis
Source: Research Square preprint supplement (doi:10.21203/rs.3.rs-5954227/v1), 2025-02-19
Supplement: Supplementary file 1 [file 22d71d93f58fecf5afe57b75.docx]

| **ID** | **Search term** |
| --- | --- |
|  | **Stroke** |
| 1 | Stroke |
| 2 | Ischemic Stroke |
| 3 | Haemorrhagic stroke |
| 4 | Cerebrovascular disorders |
| 5 | Cerebrovascular accident |
| 6 | Hemiplegia |
| 7 | 1 OR 2 OR 3 OR 4 OR 5 OR 6 |
|  | **Mood** |
| 8 | Mood disorders |
| 9 | Depression |
| 10 | Depressive disorder |
| 11 | Depressive symptoms |
| 12 | 8 OR 9 OR 10 OR 11 |
|  | **Type of study** |
| 13 | Randomized controlled trial |
| 14 | Clinical trial |
| 15 | 13 OR 14 |
|  | **Tool** |
| 16 | Exercise |
| 17 | Physical activity |
| 18 | Mind-body therapies |
| 19 | Mindfulness |
| 20 | Meditation |
| 21 | Mindfulness meditation |
| 22 | Qigong |
| 23 | Baduanjin |
| 24 | Breathing exercise |
| 25 | Yoga |
| 26 | Tai Chi |
| 27 | Tai Ji |
| 28 | Tai Chi Chuan |
| 29 | Taijiquan |
| 30 | 16 OR 17 OR 18 OR 19 OR 20 OR 21 OR 22 OR 23 OR 24 OR 25 OR 26 OR 27 OR 28 OR 29 |
| 31 | 7 AND 12 AND 15 AND 30 |
