# Supplementary material for: The effect of mind- and body-based interventions on poststroke depression and its neural mechanisms: A systematic review and meta-analysis
Source: Research Square preprint supplement (doi:10.21203/rs.3.rs-5954227/v1), 2025-02-19
Supplement: Supplementary file 2 [file 41ad3abf468e34eb68821749.docx]

Table 3: Outcomes of the studies included.

| **Author/year** | **Subject description** | **Final sample size** | **Intervention (IG)** | **Comparison group (CG)** | **Scale to measure depression** | **Baseline scores**  **(mean ± SD)** | **Post-intervention and/or follow-up scores**  **(mean ± SD)** |
| --- | --- | --- | --- | --- | --- | --- | --- |
| **Mind-based interventions** | | | | | | | |
| [19] Golding et al., 2018 | Patients after stroke with HADS-A scores ≥6 | N= 20 (IG: 10, CG: 10) | Self-help relaxation training: used a self-help autogenic  relaxation CD to practice the  relaxation at home | Waitlist (receiving intervention after 3-month) | HADS-D | IG: 8.2 ± 3.88  CG: 9.4 ± 3.60 | Post-intervention  IG: 6.10 ± 3.67  CG: 9.20 ± 4.71  1-month fup  IG: 5.70 ± 3.86  CG: 8.80 ± 4.05  2-month fup  IG: 5.80 ± 3.99  CG: 9.00 ± 4.24  12-month fup  IG: 5.50 ± 4.28  CG: 8.40 ± 5.08 |
| [17] Baldo et al., 2021 | People with a hemisphere stroke (≥ 3 months post-onset) | Baseline  N=32 (IG: 16, CG: 16)  Post-intervention  N=27 (IG: 14, CG: 13)  3-month fup : N=25 (IG: 13, CG: 12) | Mindfulness practice: Sitting meditation, body awareness, yoga, mindful movement, and informal mindfulness practices of daily  life  Homework: Meditation CDs, homework  assignments, and readings from the course materials and  manual. | Provide background and education about brain-behavior relationships, nutrition, sleep and strategies for successful aging and discuss how  brain injuries can disrupt various aspects of cognition  Homework: Readings and questions | GDS-15 | IG: 3.70 ± 3.00  CG: 3.80 ± 3.00 | Post intervention  IG: 3.40 ± 3.50  CG: 2.40 ± 1.90  3-month fup  IG: 3.70 ± 3.00  CG: 3.60 ± 2.80 |
| [18] Duan et al., 2023 | Subjects diagnosed with depression due to a stroke (1–6 months post-stroke) | N= 71 (IG1: 23, IG2: 24, CG: 24) | IG1: rTMS+MBSR  IG2: Shame rTMS+MBSR  MBSR program:  body scan meditation, mindful walking meditation, yoga/mindful movement sequences,  and seated mindfulness meditation | Sham rTMS + General psychological care | HAMD-17 | IG1: 19.04 ± 2.16  IG2: 19.13 ± 3.05  CG: 20.25 ± 1.39 | Post-intervention  IG1: 13.96 ± 2.99  IG2: 15.63 ± 2.02  CG: 17.38 ± 1.41  8-week fup  IG1: 11.96 ± 3.24  IG2: 13.96 ± 2.14  CG: 17.54 ± 2.25 |
| **Body-based interventions** | | | | | | | |
| [25] Baskett et al., 1997 | Patients discharged from hospital  after a stroke, requiring ongoing therapy | Baseline:  N=97 (IG: 50, CG: 47)  Mid-test  N=87 (IG: 41, CG: 46)  Post-test  N=91 (IG: 44, CG: 47) | Weekly prescribing a program of exercises and activities for the following week. | Referred to either the Health  Services for Older People day hospital programme, or to a physiotherapy and/or  occupational therapy outpatient department | HADS  (not mention using depression subscale or the whole scale) | Scores 11+ (%)  IG: 28.0  CG: 14.9 | Mid-test: 6-week  Scores 11+ (%)  IG: 7.3  CG: 8.7  Post-test: 12-week  Scores 11+ (%)  IG: 9.1  CG: 8.5 |
| [61] Partridge et al., 2000 | Patients with a diagnosis of stroke | Baseline:  N=77  (IG: 43, CG: 34)  Post-intervention (6-week):  N=94  (IG: 48, CG: 46)  Post-intervention (6-month):  N=84  (IG: 41, CG: 43) | Double amount of 60 minutes’ physiotherapy | Standard amount of 30 minutes’  physiotherapy | HADS (both anxiety and depression) | IG: 15.0 ± 7.9  CG: 15.5 ± 8.2 | Mid-intervention (6-week):  IG: 12.6 ± 7.6  CG: 12.9 ± 7.1  Post-intervention (6-month):  IG: 12.9 ± 7.9  CG: 12.9 ± 7.0 |
| [39] Green et al., 2002 | Patients with stroke more than 1 year and had associated persisting mobility  Problems, age> 50 | Baseline  N= 149 (IG: 76, CG: 73  Post-intervention (3 months)  N= 135 (IG: 69, CG: 66  3-month fup (6 months)  N=127 (IG: 64, CG: 63)  6-month fup (9 months)  N= 123 (IG: 62, CG: 61) | Community physiotherapy | No treatment | HADS-D | Median (IQR)  IG: 7 (5–10)  CG: 7 (4–9) | Median (IQR)  Post-intervention (3 months)  IG: 6 (4–9)  CG: 7 (4–9  3-month fup (6 months)  IG: 7 (5–9·5)  CG: 7 (4–9)  6-month fup (9 months)  IG: 8 (4–11)  CG: 7 (3-10) |
| [49] Lai et al., 2006 | Stroke patients who had completed acute rehabilitation | Baseline and post-intervention  N= 93 (IG: 44, CG: 49)  6-month fup  N= 80 (IG: 40, CG: 40) | A progressive, structured physical exercise program in home supervised by therapists (target strength, balance, endurance, and upper extremity  function) | Home health rehabilitation services and biweekly education | GDS | IG: 3.4 ± 2.8  CG: 3.8 ± 2.7 | Post-intervention  IG: 2.5 ± 2.5  CG: 4.4 ± 3.4  6-month fup  IG: 2.0 ± 1.8  CG: 3.4 ± 3.2 |
| [55] Mead et al., 2007 | Stroke patients who had completed their usual rehabilitation and  who had been discharged from the hospital | N= 66 (IG: 32, CG: 34) | Starting with a warm-up, then doing endurance and resistance training | Relaxation (attention control)  seated and included deep breathing and progressive muscular relaxation. Techniques involving muscular contraction were omitted to avoid unintentional fitness training | HADS-D | NA | Adjusted Mean (95% CI)  Post-intervention  IG: 4.05 (2.99–5.27)  CG: 3.51 (2.56–4.61)  4-month fup  IG: 4.21 (3.18–5.37)  CG: 4.03 (3.07–5.13) |
| [52] Lennon et al., 2008 | Patients with ischaemic stroke more than 1 year  (confirmed by CT or MRI scan) | N= 46 (IG: 23, CG: 23) | Aerobic exercise:  Life skills classes (stress management,  relaxation and life balance) + cycle ergometry exercise (Motomed  Viva 2) using either the upper or lower limbs.  They exercised through biofeedback alarms set  at 50–60% of their maximal heart rate | Usual  care (without aerobic exercise) | HADS-D | Median (IQR)  IG: 4.0 (0–13)  CG: 6.0 (0–20) | Median (IQR)  IG: 2.0 (0–11)  CG: 4.0 (1–20) |
| [56] Morris et al., 2008 | Patients with acute stroke between 2 and 4 weeks  after stroke onset | Baseline  N= 106 (IG: 56, CG: 50)  Post-intervention  N= 97 (IG: 51, CG: 46)  12-week fup  N= 85 (IG: 46, CG: 39) | Bilateral upper-limb task training | Unilateral upper-limb task training (followed the same program as the bilateral training group but used the paretic upper limb only) | HADS-D | IG: 6.2 ± 3.2  CG: 6.6 ± 3.7 | Post-intervention  IG: 5.8 ± 3.3  CG: 5.7 ± 3.5  12-weeks fup  IG: 5.4 ± 4.5  CG: 4.5 ± 3.2 |
| [66] Smith & Thompson, 2008 | Patients who had had an  ischaemic stroke in the distribution of the middle  cerebral artery more than three months but less  than two years | N= 20 (IG: 10, CG: 10) | Treadmill training | Weekly phone calls | BDI | IG: 13.11 ± 2.9  CG: 11.00 ± 3.1 | Post-intervention  IG: 9.40 ± 1.9  CG: 8.80 ± 3.0  6-week fup  IG: 7.30 ± 2.5  CG: 8.60 ± 2.9 |
| [65] Sims et al., 2009 | Patients with stroke ＞6 months ago and PHQ-9 score ≥ 5 | Baseline  N= 45 (IG: 23, CG: 22)  Post-intervention  N= 44 (IG: 23, CG: 21)  6-month fup  N= 43 (IG: 23, CG: 20) | Community-based progressive resistance training program: moderate  intensity (three sets of eight/ten repetitions, at a  resistance of 80% of 1-RM) strengthening exercises | Usual care | CES-D | IG: 15.43 ± 7.49  CG: 23.27 ± 8.86 | Post-intervention  IG: 15.13 ± 8.49  CG: 20.62 ± 11.79  6-month fup  IG: 13.78 ± 8.02  CG: 22.70 ± 11.17 |
| [40] Holmgren et al., 2010 | Subjects with current stroke, age ≥ 55 | Baseline  N= 34 (IG: 15, CG: 19)  Post-Intervention  N= 33 (IG: 14, CG: 19)  3-month and 6-month fup  N= 31 (IG: 13, CG: 18) | High-intensive exercise program  focus was on physical activity and functional performance | Group discussion with focus on hidden dysfunctions but no physical fitness training | GDS-15 | IG: 2.5 ± 1.7  CG: 3.4 ± 2.3 | Post-Intervention  IG: 3.1 ± 2.1  CG: 5.0 ± 2.8  3 months fup  IG: 3.2 ± 1.2  CG: 3.4 ± 2.5  6 months fup  IG: 3.0 ± 1.5  CG: 3.7 ± 2.9 |
| [76] Wang et al., 2010 * | Participants diagnosed with intracerebral haemorrhage, subarachnoid haemorrhage, or cerebral infarction | N= 29 (IG: 16, CG: 13) | Tai Chi | Rehabilitation | GHQ - severe depression | IG: 2.13 ± 2.17  CG: 1.33 ± 1.72 | IG: 0.73 ± 0.80  CG: 1.17 ± 1.53 |
| [53] Lund et al., 2012 | Subjects with a clinical diagnosis of stroke  or transient ischaemic attack determined by a physician | N= 86 (IG: 39, CG: 47) | Lifestyle course +  physical activity | Physical activity | HADS-D | IG: 4.1 ± 3.0  CG: 5.3 ± 3.8 | IG: 3.4 ± 2.7  CG: 4.2 ± 3.4 |
| [29] Chaiyawat & Kulkantrakorn, 2012 | Patients with stroke due to middle cerebral artery  infarction | 2-year fup  N=58 (IG: 30, CG: 28) | Rehabilitation programme was developed with the combined input of  experts, stroke patients, physical therapists, occupational therapists and speech therapists.  Standard materials on a DVD of rehabilitation procedures for passive exercise, active exercise, resistance exercise and ADL  Patients watched DVD and then repeatedly practiced 6 to 15min and had to watch the video sequences at least  once a day | Standard care  Received rehabilitation as prescribed by a physician and educational materials upon  discharge from hospital | HADS  (anxiety and depression items all included) | IG: 16.1 ± 7.6  CG: 16.4 ± 4.9 | 2-year fup  IG: 9.1 ± 0.3  CG: 9.1 ± 0.3  Adjusted mean ± SD  IG: 0.3 ± 4.93  CG: 5.0 ± 4.23 |
| [30] Chan et al., 2012* | People with a  minimum of 6 months elapsed time since the stroke incidence and  the presence of chronic hemiparesis | N=14 (IG: 8, CG: 6) | Hatha  yoga component, modified  asana practice and pranayama practice combined with resistance and cardiovascular exercise | Resistance and  cardiovascular- exercise | GDS-15 | IG: 4.88 ± 4.67  CG: 3.50 ± 1.52 | IG: 3.75 ± 4.46  CG: 3.17 ± 2.04 |
| [74] Van De Port et al., 2012 | Patients with stroke who were able to start  outpatient rehabilitation in one of the nine participating centres | Baseline  N= 250 (IG: 126, CG: 124)  Post-intervention and fup  N= 242 (IG: 125, CG: 117) | Circuit training:  Eight different workstations in a gym and was intended to improve  performance in tasks relating to walking competency | Usual outpatient physiotherapy | HADS-D | IG: 5.10 ± 3.60  CG: 4.40 ± 3.23 | Post-intervention  IG: 4.92 ± 3.62  CG: 4.42 ± 3.69  12-week fup  IG: 4.52 ± 3.52  CG: 4.28 ± 4.00 |
| [78] Wu et al., 2012 | Patients with acute stroke | N= 120 (IG: 60, CG: 60) | Psychological  intervention and rehabilitation training | Usual care | Symptom Checklist-90 -Depression | IG: 1.90 ± 0.73  CG: 1.93 ± 0.62 | Post-intervention  IG: 1.85 ± 0.61  CG: 1.63 ± 0.53 |
| [80] Zedlitz et al., 2012 | Patients had a stroke more than 4 months | N= 83 (IG: 38, CG: 45) | Cognitive therapy with graded activity training | Cognitive therapy | HADS-D | IG: 7.7 ± 2.7  CG: 6.6 ± 3.1 | Post-intervention  IG: 6.4 ± 2.6  CG: 5.6 ± 3.3  6-month fup  IG: 6.1 ± 3.4  CG: 5.7 ± 3.3 |
| [28] Byl et al., 2013 | Patients with  greater than 6 months post right or left hemispheric stroke | N= 15 (IG1: 5, IG2: 5, CG: 5) | Robot-assisted upper limb virtual task specific training, using UL-EX07 exoskeleton. IG1: Unilateral  IG2: Bilateral | Upper limb task specific repetitive training  guided by a physical therapist | BDI | IG1: 7.6 ± 21.50  IG2: 9.4 ± 26.59  CG: 9.8 ± 27.72 | IG1: 9.2 ± 26.02  IG2: 4.0 ± 11.31  CG: 10.0 ± 28.28 |
| [42] Immink et al., 2014 * | Patients with chronic stroke hemiparesis 9 months before baseline assessment | N= 22 (IG: 11, CG: 11) | Yoga (group and individual home practice sessions) | Wait list | GDS-15 | IG: 3.9 ± 3.3  CG: 5.8 ± 2.9 | IG: 2.7 ± 2.9  CG: 4.8 ± 3.3 |
| [44] Kirk et al., 2014 * | Patients with minor stroke (within one month of incident) | N= 24 (IG: 12, CG: 12) | Cardiac rehabilitation programme consisting of weekly exercise, education classes, and relaxation at the end | Standard care. | HADS-D | IG: 3.50 ± 0.70  CG: 1.00 ± 0.14 | IG: 1.50 ± 0.80  CG: 2.00 ± 0.40 |
| [70] Taylor-Piliae et al., 2014* | Community-dwelling survivors of ischemic stroke, 3 months poststroke | N= 145 (IG1: 53, IG2: 44, CG: 48) | IG1: Taichi Yang style 24-posture short-form  IG2: Strength and range of movement exercises | Usual care | CES-D | IG1: 14.3 ± 9.8  IG2: 11.1 ± 7.4  CG: 15.7 ± 11.9 | IG1: 14.0 ± 9.6  IG2: 11.4 ± 9.6  CG: 13.6 ± 10.2 |
| [36] Faulkner et al., 2015 | Patients diagnosed TIA or a mild/nondisabling stroke (within 7days of  symptom onset) | N= 55 (IG: 27, CG: 28) | Exercise  and education programme  Exercise sessions incorporated: (i) 30minutes of aerobic exercise, and  (ii) 60minutes of resistance training, core-stability,  and postural exercises. | Usual care | HADS-D  PMS | HADS-D  IG: 4.1 ± 4.1  CG: 3.9 ± 3.5  PMS  IG: 3.4 ± 5.1  CG: 4.7 ± 7.9 | Post-intervention  HADS-D  IG: 3.3 ± 2.9  CG: 3.9 ± 3.0  PMS  IG: 2.3 ± 3.5  CG: 4.3 ± 7.2  4-month follow-up  HADS  IG: 3.5 ± 3.7  CG: 3.6 ± 3.2  PMS  IG: 3.6 ± 4.4  CG: 3.3 ± 5.1 |
| [54] Mayo et al., 2015 | Community dwelling persons within five years of stroke onset | N= 186 (IG: 93, CG: 93) | A group-based  intervention that included exercise and project-based activities promoting learning, leisure, and  social activities, done as individuals and in groups. | Wait list | Stroke-specific GDS | IG: 28.8 ± 27.6  CG: 29.2 ± 25.0 | IG: 26.1 ± 26.9  CG: 27.4 ± 21.0 |
| [64] Shin et al., 2015 | Patients had chronic hemiparetic upper limb dysfunction, secondary to a first-ever stroke | N= 32 (IG: 16, CG: 16) | Virtual reality combined with occupational therapy | Occupational therapy | HAMD | IG: 6.3 ± 4.5  CG: 7.8 ± 7.8 | Change scores  Median (IQR)  Baseline  IG: 3.5 (3.0–9.75)  CG: 4.5 (3.0–11.0)  Post-intervention  IG: 3.0 (1.0–5.0)  CG: 3.0 (1.8–6.3) |
| [72] Topcuoglu et al., 2015 | Inpatients with stroke had complex regional pain syndrome type I | N= 40 (IG: 20, CG: 20) | Upper extremity aerobic exercise and conventional physiotherapy | Conventional physiotherapy | BDI | NA | NA  P = 0.005 |
| [46] Kongkasuwan et al., 2016* | Stroke inpatients | Baseline  N= 118 (IG: 59, CG: 59)  Post-intervention  N= 113 (IG: 54, CG: 59) | Creative art therapy (meditation with music, warm-up activity,  main activity and group singing activity, ending  with a group-healing circle) and conventional physical therapy | Conventional physical therapy | HADS-D | IG: 10.7 ± 5.8  CG: 9.8 ± 5.0 | IG: 4.4 ± 4.0  CG: 7.9 ± 4.9 |
| [62] Renner et al., 2016 | Inpatients with a primary diagnosis of a first-ever subacute stroke | Post-intervention  N= 64 (IG: 29, CG: 35)  18-week fup  N= 36 (IG: 18, CG: 18) | Participants  worked together in pairs  Group therapy task training: improve tasks relating to walking competency,  such as balance control, stair walking, turning,  transfers and speed walking | Individual task training: improve balance, physical condition and walking competency,  preferably using a graded progression | HADS-D | NA | Post-intervention  IG: 3.33 ± 3.06  CG: 3.85 ± 4.06  18-week fup  IG: 3.47 ± 2.72  CG: 3.50 ± 4.00 |
| [32] Colledge et al., 2017 | IG1: Patients with aneurysmal subarachnoid haemorrhagic stroke  IG2: Patients after surgical resection of meningioma  CG: Healthy people | N= 48 (IG1: 15, IG2: 16, CG: 17) | Moderate aerobic exercise training: start at 55–65% of their maximum heart rate during first 4 weeks, between 65 and 75% during  week 5–8, and between 75 and 85% during the last 4  weeks. | Same with IG | BDI | IG1: 8.87 ± 6.57  IG2: 8.63 ± 7.14  CG: 4.35 ± 3.20 | Post-intervention  IG1: 6.60 ± 6.31  IG2: 5.94 ± 4.96  CG: 3.77 ± 3.09  6-month fup  IG1: 7.53 ± 5.93  IG2: 5.56 ± 6.08  CG: 4.35 ± 3.37 |
| [63] Rowe et al., 2017 | Patients with a stroke more than 6 months and moderate hemiparesis | N= 30 (IG: 15, CG: 15) | High levels of robotic assistance during finger training  (causing 82% success at hitting targets) | Low levels of robotic assistance during finger training  (55% success). | GDS | NA | Change from baseline to end of therapy  IG: 0.8 ± 2.0  CG: 1.7 ± 2.1  Change from baseline to 1-month fup  IG: 1.3 ± 1.7  CG: 1.3 ± 2.6 |
| [73] Vahlberg et al., 2017 | Community-living individuals with a stroke 1–3 years | N= 67 (IG: 34, CG: 33) | Progressive  resistance and balance exercise program + motivational group discussions | Encouraged to continue their regular activities and were not  restricted from participating in ordinary physical activities and  rehabilitation programs | GDS-20 | IG: 5.6 ± 4.7  CG: 6.4 ± 5.0 | Post-intervention  IG: 5.66 ± 5.08  CG: 5.90 ± 5.77  3-month fup  IG: 5.00 ± 5.08  CG: 5.90 ± 5.77  1-year fup  IG: 4.60 ± 5.25  CG: 4.90 ± 5.61 |
| [84] Zhiyan et al., 2017 | Stroke patients (Illness/condition stable  within the last month) | N= 72 (IG: 36, CG: 36) | A recovery guidance exercise (from 9:00-12:00 a.m. and 2:00-4:00 p.m) combined with functional training within the recovery empty period (at 6:00-7:00 a.m. and 7:00-8:00 p.m.) | A recovery guidance exercise  (from 9:00-12:00 a.m. and 2:00-4:00 p.m) | SDS | IG: 66.2 ± 6.4  CG: 66.3 ± 6.3 | IG: 52.4 ± 8.3  CG: 55.7 ± 8.2 |
| [23] Aidar et al., 2018 | Subjects suffered ischemic stroke at least one year | N=36 (IG: 19, CG: 17) | Conducted in a 25 x 12.5 m unheated pool with an average depth of 1.5 m and average  temperature of 27 ºC (Equipment: dumbbells, floats and water noodles) | Same with IG but began the  activities four months after the IG | BDI | IG: 16.4 ± 7.1  CG: 16.4 ± 7.6 | IG: 12.2 ± 7.1  CG: 16.2 ± 7.2 |
| [79] Xie et al., 2018* | Participants diagnosed with stroke (first onset of stroke more than 3 months prior) | N= 244 (IG: 120, CG: 124) | Tai Chi Yunshou exercise | Balance rehabilitation training | BDI | IG: 18.3 ± 11.8  CG: 14.4 ± 10.2 | Post-intervention  IG: 8.23 ± 9.70  CG: 8.36 ± 7.59  12 weeks fup  IG: 7.27 ± 8.36  CG: 7.78 ± 7.85 |
| [20] Adomavičienė et al., 2019 | Patients with  hemiparesis secondary to ischemic or hemorrhagic stroke, who participated  consecutively in a specialized rehabilitation unit for a post-stroke time of 8.69 ± 4.27 weeks. | N=36 | Robot-assisted trainings | Virtual reality kinect-based system trainings | HADS-D | IG: 5.41 ± 3.12  CG: 8.40 ± 4.44 | IG: 4.94 ± 3.09  CG: 8.48 ± 4.43 |
| [41] Ihle-Hansen et al., 2019  (35) | Adults with first-ever or recurrent stroke due to infarction and intracerebral  haemorrhage | N= 362 (IG: 177, CG: 185) | Home visits and individualized coaching by physiotherapist  Patients achieve physical activity 30 min daily, and 45–60 min physical  exercise including 2–3 bouts of vigorous activity every week by themselves | Usual care | HADS-D | IG: 2.9 ± 2.66  CG: 3.5 ± 2.72 | IG: 3.7 ± 2.66  CG: 3.9 ± 4.08 |
| [67] Steen Krawcyk et al., 2019 | Adults diagnosed with a first-time  or recurrent lacunar stroke | N= 63 (IG: 31, CG: 32) | HIIT: Exercise at 77–93% of the maximum heart rate, corresponding  to 14–16 on the Borg-rated perceived-exertion scale (28) or “not  able to speak comfortably” on the Talk Test | Usual care | MDI | Median (IQR)  IG: 5 (1,10  CG: 9 (4,12) | Median (IQR)  IG: 6 (3,13)  CG: 7 (4,15) |
| [21] Aguiar et al., 2020 | Individuals had a diagnosis of stroke >6 months | N=22 (IG: 11, CG: 11) | Aerobic  treadmill training at 60-80% of heart rate reserve | Outdoor-overground walking below 40% of heart rate  reserve | PHQ | IG: 4.7 ± 5.8  CG: 4.9 ± 6.0 | Post-intervention  IG: 1.7 ± 4.0  CG: 3.6 ± 5.6  4-week fup  IG: 1.8 ± 3.2  CG: 3.6 ± 6.4 |
| [24] Alıpsatıcı et al., 2020 | Patients had a stroke 6 months-2 years ago | N=28 (IG: 14, CG: 14) | No incline  First week: 80% of  the maximum speed  Increase the  speed every week by 10% of the previous week | Speed: 80% of the maximum  Speed  First week: the inclination was set to 3%  Increased by 1-1.5% every week according to the  condition of the patient | BDI | IG: 14.00 ± 4.61  CG: 18.40 ± 8.08 | IG: 11.00 ± 4.91  CG: 14.46 ± 8.28 |
| [31] Chippala & Sharma, 2020 | Patients were admitted within 24 hours of onset of symptoms | N=95 (IG: 48, CG: 47) | Very early  mobilisation including out of bed activities such as sitting,  standing upright, walking begun within 24 hours of stroke onset | Standard  physiotherapy care | HADS-D | IG: 12.18 ± 3.16  CG: 12.97 ± 2.58 | At discharge  IG: 6.77 ± 2.65  CG: 9.85 ± 3.39  At 3rd month fup  IG: 6.60 ± 2.55  CG: 10.19 ± 3.56 |
| [33] De Luca et al., 2020 | Subjects who first ever, supratentorial, ischemic  stroke in the chronic phase | N= 30 (IG: 15, CG: 15) | Overground exoskeleton Ekso-GT: robotic gait rehabilitation | Standard gait training | HAMD | Median and interquartile range (IQR)  IG: 12 (11–18)  CG: 12 (10–17) | Median and interquartile range (IQR)  IG: 11 (9–16)  CG: 13 (9–15) |
| [45] Koch et al., 2020 | Patients had stroke within 1 year | N= 131 (IG: 86, CG: 45) | Combined aerobic, resistance, and cognitive training | Sham IG:  Supervised training of mild stretching and range-of-motion exercises + computer games such as hangman, anagrams, and word search | CED-D | IG: 16 ± 12  CG: 18 ± 12 | IG: 12 ± 10  CG: 14 ± 12 |
| [47] Kotov et al., 2020 | Patients with ischemic stroke in the acute phase | N= 100 (IG: 50, CG: 50) | Daily robot-assisted training using MOTOmed bedside trainer and tablet PC technology for independent exercises: “passive training” and “active training”  mode for legs with reversal of the forward and backward  directions every 5 min; Sessions started outside the time framework of the acute  period of 3–5 days after stabilization of status | Standard  therapy | BDI | Baseline (day 5)  IG: 6.32 ± 0.48  CG: 5.92 ± 0.48 | Post-intervention (day 21)  IG: 5.1 ± 0.39  CG: 8.68 ± 0.37  3-month fup  IG: 4.32 ± 0.37  CG: 9.4 ± 0.39  6-month fup  IG: 3.06 ± 0.31  CG: 8.72 ± 0.53 |
| [58] Pálsdóttir et al., 2020* | Stroke survivors, identified through routine 3-month follow-up visit (sub-acute) or medical  records (chronic stroke >1 year prior) | Baseline and post-intervention  N= 101 (IG: 51, CG: 50)  8-month FUP  N= 92 (IG: 48, CG: 44)  14-month FUP  N= 88 (IG: 47, CG: 41) | Nature-based rehabilitation, including group gathering, exercise, garden and horticultural occupations, or “just being” to facilitate rest and mental recovery in an enriched garden  environment | Standard care | HADS-D | IG: 5.37  CG: 5.86 | 8-month fup (after randomization)  IG: 4.33  CG: 4.68  14-month fup (after randomization)  IG: 4.74 ± 5.35  CG: 4.90 ± 2.05 |
| [60] Park et al., 2020 | Patients with acute cortical/subcortical  ischemic stroke (2-weeks post-stroke onset) | N= 14 (IG: 7, CG: 7) | Robot-assisted gait training and physical therapy | Conventional gait training and physical therapy | BDI-II | IG: 8.71 ± 5.38  CG: 8.86 ± 3.93 | IG: 9.86 ± 9.89  CG: 4.14 ± 2.41 |
| [77] X. Wang et al., 2020 | Patients with 3 to 6 months post-spontaneous intracerebral hemorrhage | N= 134 (IG: 67, CG: 67) | Mindfulness-based cognitive therapy | Stress management  education | CES-D | IG: 18.48 ± 6.91  CG: 19.96 ± 8.17 | IG: 16.34 ± 7.05  CG: 20.46 ± 9.29 |
| [27] Busk et al., 2021 | Patients were first-time  acute ischemic or hemispheric stroke verified by medical imaging or were diagnosed by a stroke physician based on clinical  symptoms within 2 days after stroke onset | N=50 (IG: 25, CG: 25) | Exercise with neuromuscular electrical stimulation of vastus medial and tibial muscles | Exercise consisted of daily life  activities, altering between rising from and sitting down on  a chair and walking every other day, respectively | BDI | Not measure | 95% CI  Post intervention vs. fup  IG: -1.5 (-4.0 to 0)  CG: -1.5 (-3.5 to 1.0) |
| [34] De Rooij et al., 2021 | People diagnosed with stroke and time since  stroke between 2 weeks and 6 months | 3-month fup  N= 50 (IG: 27, CG: 23) | Virtual reality gait training | Conventional treadmill training and function gait exercises | HADS-D | IG: 4.39 ± 3.35  CG: 3.54 ± 2.28 | Post-intervention  IG: 4.04 ± 3.49  CG: 2.83 ± 2.16  3-month fup  IG: 3.56 ± 3.5  CG: 2.65 ± 2.50 |
| [38] Gjellesvik et al., 2021 | Subjects diagnosed with first-ever stroke | Baseline  N= 70 (IG: 36, CG: 34)  Post-test  N= 60 (IG: 32, CG: 28)  Follow-up  N= 52 (IG: 25, CG: 27) | 10min warm-up and 16 minutes of treadmill HIIT: 4-minute intervals at 85%-95% of peak heart rate (HR peak) separated by 3  minutes of active breaks (reduced walking intensity) at heart rate  50%-70% of HR peak | Standard care  given information about the benefits of high levels  of physical activity | HADS-D | IG: 3.50 ± 3.17  CG: 3.18 ± 3.24 | Post-intervention  IG: 3.75 ± 4.18  CG: 2.57 ± 2.50  12-month fup  IG: 2.76 ± 2.99  CG: 2.74 ± 2.77 |
| [81] Zhang et al., 2021 | Patients after stroke with HAMD-17 score ≥7 | N= 60 (IG: 30, CG: 30) | Upper limb mirror therapy and regular occupational therapy | Regular occupational therapy | HAMD-17 | IG: 12.0 ± 3.4  CG: 12.2 ± 3.9 | IG: 10.3 ± 4.0  CG: 12.6 ± 4.4 |
| [26] Brauer et al., 2022 | Patients with stroke (within  2 months of a stroke) | Post-test  N=108 (IG: 49, CG: 53)  18-week fup  N=89 (IG: 45, CG: 44) | Treadmill training: Start at an intensity of 40%  HRR, increasing each week until 60% was reached  Self-management  Education: Encourage selfmonitoring of physical activity and guide participants  through the process of setting short- and long-term goals and formulate action plans and coping strategies for  maintaining walking behavior | Usual gait training supervised by their  usual physiotherapist | HADS-D | NA | Post-test  IG: 4.4 ± 4.0  CG: 3.9 ± 3.6  18-week fup  IG: 5.1 ± 4.2 CG: 3.7 ± 3.2 |
| [35] Deijle et al., 2022 | Patients with a transient or  minor ischemic stroke had the  onset less than 1month ago | N=119 (IG: 60, CG: 59) | Exercise program consisted  of both aerobic and strength training | Standard care | HADS-D | IG: 3.9 ± 3.1  CG: 4.7 ± 3.6 | 12-month (post-intervention)  IG: 3.8 ± 3.7  CG: 4.8 ± 3.5  24-month (1-year fup)  IG: 3.4 ± 3.2  CG: 4.5 ± 3.7 |
| [75] D. Wang et al., 2022 | Patients with ischemic stroke within 6 months | N= 75 (IG1: 24, IG2: 26, CG: 25) | IG1: Constraint induced movement therapy plus conventional rehabilitation training  IG2: upper limb task-oriented training plus conventional rehabilitation training | Conventional rehabilitation training only | SDS | IG1: 59.08 ± 6.95  IG2: 57.58 ± 4.61  CG: 58.24 ± 5.25 | IG1: 43.13 ± 5.05  IG2: 36.46 ± 3.43  CG: 47.36 ± 7.04 |
| [37] Ghaffari et al., 2022 | People with stroke with unilateral hemiplegia in  the past 6 to 36 months ago | N= 32 (IG: 16, CG: 16) | Vestibular rehabilitation: workout on  trampoline, firm surface, foam, and a balance board with  eyes open and close; sideways, upward, and downward head  motions; throw and catch ball with alterations in the center  of gravity; walking while moving the head; and moving a ball  in hands from side to side. | Stretching, strengthening, and range of motion exercises for  the limbs and trunk based on the stroke rehabilitation guidelines | BDI-II | IG: 12.33 ± 6.56  CG: 12.44 ± 4.78 | IG: 9.05 ± 5.59  CG: 12.33 ± 4.88 |
| [82] J. Zhao et al., 2022* | Patients with first-ever ischemic stroke in subacute stage | N= 160 (IG: 80, CG: 80) | Sitting Tai Chi program | Hospital recommended upper limb movements | GDS-Short Form | IG: 5.85 ± 1.56  CG: 5.53 ± 1.95 | T1 - 1 week (mid-intervention)  IG: 5.56 ± 1.50  CG: 5.07 ± 2.14  T2 - 8 weeks (mid-intervention)  IG: 3.97 ± 1.43  CG: 4.69 ± 2.33  T3 - 12 weeks (post-intervention)  IG: 2.83 ± 1.11  CG: 4.13 ± 1.86  T4 -16 weeks (4-week fup)  IG: 2.54 ± 1.24  CG: 4.05 ± 2.14 |
| [43] Kiper et al., 2022* | Patients with a history of ischaemic stroke and GDS-30 score ≥ 10 | N= 60 (IG: 30, CG: 30) | VR therapy: Treatment in an immersive VR therapeutic garden with elements of  psychotherapy and physical activity of the upper extremities | Schultz’s Autogenic  Training: An autogenic training is playing from CD. Patients need to duplicate the body relaxation exercises he hears through  headphones | GDS-30  HADS-D | GDS  IG: 13.78 ± 0.84  CG: 13.43 ± 1.34  HADS-D  IG: 7.11 ± 0.98  CG: 6.84 ± 1.21 | GDS  Post-intervention  IG: 7.45 ± 0.54  CG: 10.02 ± 0.86  3-week fup  IG: 7.19 ± 0.67  CG: 10.25 ± 1.06  HADS-D  Post-intervention  IG: 5.60 ± 0.76  CG: 6.05 ± 0.66  3-week fup  IG: 5.05 ± 0.90  CG: 6.11 ± 0.79 |
| [83] L. Zhao et al., 2022 | Inpatients had approximately two weeks after the  stroke with at least eight points on the Chinese  version of Hamilton Depression Rating Scale with 24 items  (HDRS-24) | N= 65 (IG: 32, CG: 33) | Musicokinetic therapy: exercise with background music (the same type of ambient pure music from Bandari) | Exercise  therapy | HAMD-24 | IG: 23.97 ± 11.33  CG: 32.30 ± 17.90 | Week 4 (mid-intervention)  IG: 19.81 ± 10.47  CG: 30.33 ± 18.47  Week 8 (post-intervention)  IG: 16.38 ± 9.92  CG: 29.70 ± 19.43 |
| [57] Nindorera et al., 2023 | Community-dwelling individuals with chronic stroke who were no longer in conventional  rehabilitation | N= 46 (IG: 23, CG: 23) | 12-week Circuit walking, balance, cycling  and strength training  **Crossover**  12-week sociocultural activities | 12-week sociocultural activities  **Crossover**  12-week Circuit walking, balance, cycling  and strength training | HADS-D | IG: 7.87 ± 2.47  CG: 7.74 ± 2.47 | T2 (Post-intervention for IG)  IG: 2 ± 1.16  CG: 2.74 ± 2.28  T3 (Post-intervention for CG)  IG: 0.74 ± 0.68  CG: 0.91 ± 1.5  T4 (12-week fup)  IG: 1.7 ± 2.22  CG: 1.35 ± 2.16 |
| [59] Palumbo et al., 2022 | Adults with chronic hemiparesis from a stroke at least 1 month before | Baseline  N= 25 (IG: 13, CG: 12)  Post-intervention  N= 22 (IG: 13, CG: 9) | Music Upper Limb Therapy–  Integrated | Home exercise program:  Target repetitive upper limb movements including shoulder  flexion, abduction and adduction, elbow flexion and extension,  forearm supination and pronation, and wrist flexion and extension | PHQ-9 | IG: 8.31 ± 6.34  CG: 4.25 ± 4.39 | IG: 3.15 ± 3.00  CG: 3.44 ± 5.70 |
| [68] Sun et al., 2022* | Patients with mild depression after ischemic stroke  diagnosed between the first and  eighteenth month | N= 60 (IG: 30, CG: 30) | Traditional Chinese Yijinjing and Qigong exercise | Routine  segmental rehabilitation training | HAMD-24 | IG: 14.57 ± 4.66  CG: 16.23 ± 4.19 | Post-intervention  IG: 12.10 ± 4.75  CG: 16.60 ± 4.55  1-month fup  IG: 9.87 ± 4.27  CG: 16.37 ± 4.95 |
| [69] Taravati et al., 2022 | Patients had a single stroke with a duration of 4 to 30 months | N= 27 (IG: 17, CG: 20) | Upper limb robotic training and conventional rehabilitation | Conventional rehabilitation | CES-D | IG: 29.18±11.14  CG: 27.5±9.5 | IG: 19.41±8.32  CG: 26.1±8.18 |
| [48] Krawcyk et al., 2023 | Patients diagnosed with a first-time or recurrent lacunar stroke | Baseline  N= 71 (IG: 35, CG: 36)  Post-intervention  N= 63 (IG: 31, CG: 32) | HIIT  Same with 49 | Usual care | MDI | IG: 7.71 ± 8.52  CG: 10.06 ± 6.79 | Post-intervention  IG: 9.58 ± 8.66  CG: 9.56 ± 7.65 |
| [50] Lapointe et al., 2022 | Patients with ischemic stroke or  TIA with a minimum of 3 months post event and no  maximum | N= 40 (IG1: 15, IG2: 13, CG: 12) | IG1: High  intensity interval training only or combining with moderate intensity continuous training  IG2: Moderate intensity continuous training | Usual care | HADS  (anxiety and depression items all included) | IG1: 11.1 ± 4.1  IG2: 11.8 ± 7.2  CG: 11.3 ± 6.1 | Post-intervention  IG1: 7.6 ± 3.6  IG2: 9.2 ± 4.4  CG: 11.6 ± 4.4  6-month fup  IG1: 7.4 ± 3  IG2: 9.3 ± 6.2  CG: 12.0 ± 4.2 |
| [51] Lee et al., 2023 | Patients were more than 6 months post-stroke | N= 28 (IG: 13, CG: 15) | Gait training on a sandy beach | Gait training on a firm floor in an indoor facility | BDI | IG: 18.46 ± 11.60  CG: 14.80 ± 6.69 | IG: 14.80 ± 6.69  CG: 9.87 ± 8.42 |
| [71] Tollár et al., 2023 | Subacute ischemic stroke patients | N=457 (IG1: 129, IG2: 115, CG1: 111, CG2: 102) | IG1 and IG2: Non-immersive, high-intensity exergaming for 2 years | CG: No interventions | BDI | IG1: 11.48 ± 7.37  IG2: 10.55 ± 2.63  CG: 10.4 ± 2.65 | Mid-intervention  6-month  IG1: 10.74 ± 2.66  IG2: 10.64 ± 2.83  CG: 11.36 ± 3.50  12-month  IG1: 10.15 ± 2.62  IG2: 10.67 ± 2.96  CG: 10.94 ± 3.64  18-month  IG1: 10.62 ± 2.93  IG2: 11.31 ± 3.4  CG: 11.35 ± 3.97  Post-intervention  24-month  IG1: 10.53 ± 2.42  IG2: 11.26 ± 3.21  CG: 12.12 ± 4.56 |
| [22] Ahmed et al., 2024 | Patients with more than 1 month of ischemic stroke | N=30 (IG: 15, CG: 15) | Low  load resistance training (40% of 1-Repetition Maximum (1-RM)) with BFR | High load resistance training (80% of 1-RM) | HADS-D | IG: 7.73 ± 2.86  CG: 6.26 ± 2.15 | IG: 4.93 ± 1.98  CG: 4.26 ± 1.70 |
| **Combined mind and body-based interventions** | | | | | | | |
| [76] Wang et al., 2010* | Participants diagnosed with intracerebral haemorrhage, subarachnoid haemorrhage, or cerebral infarction | N= 29 (IG: 16, CG: 13) | Tai Chi | Rehabilitation | GHQ - severe depression | IG: 2.13 ± 2.17  CG: 1.33 ± 1.72 | IG: 0.73 ± 0.80  CG: 1.17 ± 1.53 |
| [30] Chan et al., 2012* | People with a  minimum of 6 months elapsed time since the stroke incidence and  the presence of chronic hemiparesis | N=14 (IG: 8, CG: 6) | Hatha  yoga component, modified  asana practice and pranayama practice combined with resistance and cardiovascular exercise | Resistance and  cardiovascular- exercise | GDS-15 | IG: 4.88 ± 4.67  CG: 3.50 ± 1.52 | IG: 3.75 ± 4.46  CG: 3.17 ± 2.04 |
| [42] Immink et al., 2014*  (36) | Patients with chronic stroke hemiparesis 9 months before baseline assessment | N= 22 (IG: 11, CG: 11) | Yoga (group and individual home practice sessions) | Wait list | GDS-15 | IG: 3.9 ± 3.3  CG: 5.8 ± 2.9 | IG: 2.7 ± 2.9  CG: 4.8 ± 3.3 |
| [44] Kirk et al., 2014* | Patients with minor stroke (within one month of incident) | N= 24 (IG: 12, CG: 12) | Cardiac rehabilitation programme consisting of weekly exercise, education classes, and relaxation at the end | Standard care. | HADS-D | IG: 3.50 ± 0.70  CG: 1.00 ± 0.14 | IG: 1.50 ± 0.80  CG: 2.00 ± 0.40 |
| [70] Taylor-Piliae et al., 2014* | Community-dwelling survivors of ischemic stroke, 3 months poststroke | N= 145 (IG1: 53, IG2: 44, CG: 48) | IG1: Taichi Yang style 24-posture short-form  IG2: Strength and range of movement exercises | Usual care | CES-D | IG1: 14.3 ± 9.8  IG2: 11.1 ± 7.4  CG: 15.7 ± 11.9 | IG1: 14.0 ± 9.6  IG2: 11.4 ± 9.6  CG: 13.6 ± 10.2 |
| [46] Kongkasuwan et al., 2016* | Stroke inpatients | Baseline  N= 118 (IG: 59, CG: 59)  Post-intervention  N= 113 (IG: 54, CG: 59) | Creative art therapy (meditation with music, warm-up activity,  main activity and group singing activity, ending  with a group-healing circle) and conventional physical therapy | Conventional physical therapy | HADS-D | IG: 10.7 ± 5.8  CG: 9.8 ± 5.0 | IG: 4.4 ± 4.0  CG: 7.9 ± 4.9 |
| [79] Xie et al., 2018* | Participants diagnosed with stroke (first onset of stroke more than 3 months prior) | N= 244 (IG: 120, CG: 124) | Tai Chi Yunshou exercise | Balance rehabilitation training | BDI | IG: 18.3 ± 11.8  CG: 14.4 ± 10.2 | Post-intervention  IG: 8.23 ± 9.70  CG: 8.36 ± 7.59  12 weeks fup  IG: 7.27 ± 8.36  CG: 7.78 ± 7.85 |
| [58] Pálsdóttir et al., 2020* | Stroke survivors, identified through routine 3-month follow-up visit (sub-acute) or medical  records (chronic stroke >1 year prior) | Baseline and post-intervention  N= 101 (IG: 51, CG: 50)  8-month FUP  N= 92 (IG: 48, CG: 44)  14-month FUP  N= 88 (IG: 47, CG: 41) | Nature-based rehabilitation, including group gathering, exercise, garden and horticultural occupations, or “just being” to facilitate rest and mental recovery in an enriched garden  environment | Standard care | HADS-D | IG: 5.37  CG: 5.86 | 8-month fup (after randomization)  IG: 4.33 ± 2.32  CG: 4.68 ± 1.87  14-month fup (after randomization)  IG: 4.74 ± 5.35  CG: 4.90 ± 2.05 |
| [82] J. Zhao et al., 2022* | Patients with first-ever ischemic stroke in subacute stage | N= 160 (IG: 80, CG: 80) | Sitting Tai Chi program | Hospital recommended upper limb movements | GDS-Short Form | IG: 5.85 ± 1.56  CG: 5.53 ± 1.95 | T1 - 1 week (mid-intervention)  IG: 5.56 ± 1.50  CG: 5.07 ± 2.14  T2 - 8 weeks (mid-intervention)  IG: 3.97 ± 1.43  CG: 4.69 ± 2.33  T3 - 12 weeks (post-intervention)  IG: 2.83 ± 1.11  CG: 4.13 ± 1.86  T4 -16 weeks (4-week fup)  IG: 2.54 ± 1.24  CG: 4.05 ± 2.14 |
| [43] Kiper et al., 2022* | Patients with a history of ischaemic stroke and GDS-30 score ≥ 10 | N= 60 (IG: 30, CG: 30) | VR therapy: Treatment in an immersive VR therapeutic garden with elements of  psychotherapy and physical activity of the upper extremities | Schultz’s Autogenic  Training: An autogenic training is playing from CD. Patients need to duplicate the body relaxation exercises he hears through  headphones | GDS-30  HADS-D | GDS  IG: 13.78 ± 0.84  CG: 13.43 ± 1.34  HADS-D  IG: 7.11 ± 0.98  CG: 6.84 ± 1.21 | GDS  Post-intervention  IG: 7.45 ± 0.54  CG: 10.02 ± 0.86  3-week fup  IG: 7.19 ± 0.67  CG: 10.25 ± 1.06  HADS-D  Post-intervention  IG: 5.60 ± 0.76  CG: 6.05 ± 0.66  3-week fup  IG: 5.05 ± 0.90  CG: 6.11 ± 0.79 |
| [68] Sun et al., 2022* | Patients with mild depression after ischemic stroke diagnosed between the first and  eighteenth month | N= 60 (IG: 30, CG: 30) | Traditional Chinese Yijinjing and Qigong exercise | Routine  segmental rehabilitation training | HAMD-24 | IG: 14.57 ± 4.66  CG: 16.23 ± 4.19 | Post-intervention  IG: 12.10 ± 4.75  CG: 16.60 ± 4.55  1-month fup  IG: 9.87 ± 4.27  CG: 16.37 ± 4.95 |

Abbreviations: BDI: Beck Depression Inventory; CES-D: Center for Epidemiologic Studies Depression Scale; GDS: Geriatric Depression Scale; HADS: Hospital Anxiety and Depression Scale; GHQ: General Health Questionnaire; HAMD: Hamilton Depression Rating Scale; MDI: Major Depression Inventor; PHQ: Patient Health Questionnaire; PMS: Depression in Profile of Mood State; SDS: Self-Rating Depression Scale
