# Supplementary material for: The effect of mind- and body-based interventions on poststroke depression and its neural mechanisms: A systematic review and meta-analysis
Source: Research Square preprint supplement (doi:10.21203/rs.3.rs-5954227/v1), 2025-02-19
Supplement: Supplementary file 3 [file 50440c96b25a44f219f751a7.docx]

| **Protocol** | **Outcome** | **n** | **Effect size** | | |  | **Heterogeneity** | |
| --- | --- | --- | --- | --- | --- | --- | --- | --- |
| **Hedges’ g** | **95 % CI** | ***p*** |  | ***I*2** | ***p*** |
| All mind- and body-based interventions | Depression | 66 | -0.572 | -0.718 to -0.425 | <0.001*** |  | 82.51% | <0.001*** |
| Mind- and body-based interventions with follow-up | Depression | 30 | -0.739 | -1. 009 to -0.469 | <0.001*** |  | 89.77% | <0.001*** |
| Mind-based interventions | Depression | 4 | -0.549 | -0.878 to -0.220 | 0.001** |  | 0.000 | 0.497 |
| Mind-based interventions with follow-up | Depression | 4 | -0.802 | -1. 463 to -0.141 | 0.017* |  | 71.66% | 0.014* |
| Body-based interventions | Depression | 52 | -0.532 | -0.699 to -0.365 | <0.001*** |  | 83.34% | <0.001*** |
| Body-based interventions with follow-up | Depression | 22 | -0.700 | -1.043 to -0.356 | <0.001*** |  | 91.33% | <0.001*** |
| Combined interventions | Depression | 10 | -0.805 | -1.167 to -0.442 | <0.001*** |  | 80.99% | <0.001*** |
| Combined interventions with follow-up | Depression | 4 | -0.994 | -1.406 to -0.582 | <0.001*** |  | 77.14% | 0.004** |

*p<0.05, **p<0.01, *** p<0.001
