# Supplementary material for: The effect of mind- and body-based interventions on poststroke depression and its neural mechanisms: A systematic review and meta-analysis
Source: Research Square preprint supplement (doi:10.21203/rs.3.rs-5954227/v1), 2025-02-19
Supplement: Supplementary file 4 [file 7b37a97db600f3c7de2f489e.docx]

| **Study** | **Item 1** | **Item 2** | **Item 3** | **Item 4** | **Item 5** | **Item 6** | **Item 7** | **Item 8** | **Item 9** | **Item 10** | **Total scores** |
| --- | --- | --- | --- | --- | --- | --- | --- | --- | --- | --- | --- |
| [20] Adomavičienė et al., 2019 | 1 | 0 | 1 | 0 | 0 | 0 | 0 | 0 | 1 | 1 | 4 |
| [21] Aguiar et al., 2020 | 1 | 1 | 1 | 0 | 0 | 1 | 1 | 0 | 1 | 1 | 7 |
| [22] Ahmed et al., 2024 | 1 | 1 | 1 | 0 | 0 | 1 | 0 | 1 | 1 | 1 | 7 |
| [23] Aidar et al., 2018 | 1 | 0 | 1 | 0 | 0 | 0 | 0 | 0 | 1 | 1 | 4 |
| [24] Alıpsatıcı et al., 2020 | 1 | 0 | 1 | 0 | 0 | 0 | 0 | 1 | 1 | 1 | 5 |
| [17] Baldo et al., 2021 | 1 | 1 | 0 | 0 | 0 | 1 | 0 | 0 | 1 | 1 | 5 |
| [25] Baskett et al., 1997 | 1 | 1 | 0 | 0 | 0 | 1 | 1 | 1 | 1 | 1 | 7 |
| [26] Brauer et al., 2022 | 1 | 1 | 0 | 0 | 0 | 1 | 1 | 1 | 1 | 1 | 7 |
| [27] Busk et al., 2021 | 1 | 1 | 0 | 0 | 0 | 0 | 1 | 1 | 1 | 1 | 6 |
| [28] Byl et al., 2013 | 1 | 0 | 1 | 0 | 0 | 1 | 0 | 0 | 1 | 1 | 5 |
| [29] Chaiyawat and Kulkantrakorn, 2012 | 1 | 1 | 1 | 0 | 0 | 0 | 1 | 1 | 1 | 1 | 7 |
| [30] Chan et al., 2012 | 1 | 1 | 1 | 0 | 0 | 1 | 0 | 0 | 1 | 1 | 6 |
| [31] Chippala and Sharma, 2020 | 1 | 1 | 1 | 0 | 0 | 1 | 0 | 1 | 1 | 1 | 7 |
| [32] Colledge et al., 2017 | 0 | 0 | 1 | 0 | 0 | 0 | 1 | 0 | 1 | 1 | 4 |
| [75] D. Wang et al., 2022 | 1 | 1 | 1 | 0 | 0 | 0 | 0 | 1 | 1 | 1 | 6 |
| [33] De Luca et al., 2020 | 1 | 0 | 1 | 0 | 0 | 0 | 1 | 1 | 1 | 1 | 6 |
| [34] De Rooij et al., 2021 | 1 | 1 | 1 | 0 | 0 | 1 | 1 | 1 | 1 | 1 | 8 |
| [35] Deijle et al., 2022 | 1 | 1 | 1 | 0 | 0 | 1 | 1 | 1 | 1 | 1 | 8 |
| [18] Duan et al., 2023 | 1 | 0 | 1 | 1 | 0 | 1 | 0 | 1 | 1 | 1 | 7 |
| [36] Faulkner et al., 2015 | 1 | 1 | 1 | 0 | 0 | 1 | 0 | 1 | 1 | 1 | 7 |
| [37] Ghaffari et al., 2022 | 1 | 0 | 1 | 0 | 1 | 0 | 1 | 1 | 1 | 1 | 7 |
| [38] Gjellesvik et al., 2021 | 1 | 0 | 1 | 0 | 0 | 1 | 1 | 1 | 1 | 1 | 7 |
| [19] Golding et al., 2018 | 1 | 0 | 1 | 0 | 0 | 0 | 0 | 0 | 1 | 1 | 4 |
| [39] Green et al., 2002 | 1 | 1 | 1 | 0 | 0 | 1 | 1 | 1 | 1 | 1 | 8 |
| [40] Holmgren et al., 2010 | 1 | 0 | 1 | 0 | 0 | 1 | 1 | 1 | 1 | 1 | 7 |
| [41] Ihle-Hansen et al., 2019 | 1 | 0 | 1 | 0 | 0 | 1 | 1 | 1 | 1 | 1 | 7 |
| [42] Immink et al., 2014 | 1 | 1 | 1 | 0 | 0 | 1 | 0 | 1 | 1 | 1 | 7 |
| [82] J. Zhao et al., 2022 | 1 | 1 | 1 | 0 | 0 | 1 | 1 | 1 | 1 | 1 | 8 |
| [43] Kiper et al., 2022 | 1 | 1 | 1 | 0 | 0 | 1 | 1 | 0 | 1 | 1 | 7 |
| [44] Kirk et al., 2014 | 1 | 1 | 0 | 0 | 0 | 1 | 1 | 1 | 1 | 1 | 7 |
| [45] Koch et al., 2020 | 1 | 0 | 1 | 1 | 0 | 0 | 1 | 0 | 1 | 1 | 6 |
| [46] Kongkasuwan et al., 2016 | 1 | 1 | 1 | 0 | 0 | 1 | 1 | 1 | 1 | 1 | 8 |
| [47] Kotov et al., 2020 | 1 | 0 | 1 | 0 | 0 | 0 | 1 | 1 | 1 | 1 | 6 |
| [48] Krawcyk et al., 2023 | 1 | 1 | 1 | 0 | 0 | 1 | 0 | 1 | 1 | 1 | 7 |
| [83] L. Zhao et al., 2022 | 1 | 0 | 1 | 0 | 0 | 0 | 0 | 1 | 1 | 1 | 5 |
| [49] Lai et al., 2006 | 1 | 0 | 1 | 0 | 0 | 1 | 1 | 1 | 1 | 1 | 7 |
| [50] Lapointe et al., 2022 | 1 | 0 | 1 | 0 | 0 | 0 | 0 | 0 | 1 | 1 | 4 |
| [51] Lee et al., 2023 | 1 | 0 | 1 | 0 | 0 | 1 | 1 | 1 | 1 | 1 | 7 |
| [52] Lennon et al., 2008 | 1 | 1 | 1 | 0 | 0 | 1 | 1 | 1 | 1 | 1 | 8 |
| [53] Lund et al., 2012 | 1 | 1 | 1 | 0 | 0 | 1 | 0 | 1 | 1 | 1 | 7 |
| [54] Mayo et al., 2015 | 0 | 0 | 1 | 0 | 0 | 1 | 1 | 0 | 1 | 1 | 5 |
| [55] Mead et al., 2007 | 1 | 0 | 0 | 0 | 0 | 1 | 1 | 1 | 1 | 1 | 6 |
| [56] Morris et al., 2008 | 1 | 1 | 1 | 0 | 0 | 1 | 0 | 1 | 1 | 1 | 7 |
| [57] Nindorera et al., 2023 | 1 | 1 | 1 | 0 | 0 | 1 | 1 | 1 | 1 | 1 | 8 |
| [58] Pálsdóttir et al., 2020 | 1 | 1 | 1 | 0 | 0 | 1 | 1 | 1 | 1 | 1 | 8 |
| [59] Palumbo et al., 2022 | 1 | 1 | 1 | 0 | 0 | 0 | 0 | 0 | 1 | 1 | 5 |
| [60] Park et al., 2020 | 1 | 0 | 1 | 0 | 0 | 0 | 1 | 1 | 1 | 1 | 6 |
| [61] Partridge et al., 2000 | 1 | 1 | 1 | 0 | 0 | 1 | 0 | 1 | 1 | 1 | 7 |
| [62] Renner et al., 2016 | 1 | 0 | 0 | 0 | 0 | 1 | 1 | 1 | 1 | 1 | 6 |
| [63] Rowe et al., 2017 | 1 | 0 | 0 | 1 | 0 | 1 | 1 | 1 | 1 | 1 | 7 |
| [64] Shin et al., 2015 | 1 | 0 | 1 | 0 | 0 | 1 | 0 | 1 | 1 | 1 | 6 |
| [65] Sims et al., 2009 | 1 | 1 | 1 | 0 | 0 | 0 | 1 | 1 | 1 | 1 | 7 |
| [66] Smith & Thompson, 2008 | 1 | 0 | 1 | 0 | 0 | 0 | 1 | 1 | 1 | 1 | 6 |
| [67] Steen Krawcyk et al., 2019 | 1 | 1 | 1 | 0 | 0 | 1 | 0 | 1 | 1 | 1 | 7 |
| [68] Sun et al., 2022 | 1 | 1 | 1 | 0 | 0 | 1 | 1 | 1 | 1 | 1 | 8 |
| [69] Taravati et al., 2022 | 1 | 0 | 1 | 0 | 1 | 1 | 0 | 0 | 1 | 1 | 6 |
| [70] Taylor-Piliae et al., 2014 | 1 | 1 | 1 | 0 | 0 | 1 | 1 | 1 | 1 | 1 | 8 |
| [71] Tollár et al., 2023 | 0 | 1 | 1 | 0 | 0 | 1 | 0 | 1 | 1 | 1 | 6 |
| [72] Topcuoglu et al., 2015 | 1 | 0 | 0 | 0 | 0 | 1 | 1 | 1 | 1 | 1 | 6 |
| [73] Vahlberg et al., 2017 | 1 | 1 | 1 | 0 | 0 | 1 | 1 | 1 | 1 | 1 | 8 |
| [74] Van De Port et al., 2012 | 1 | 0 | 1 | 0 | 0 | 1 | 1 | 1 | 1 | 1 | 7 |
| [76] W. Wang et al., 2010 | 1 | 1 | 1 | 0 | 0 | 1 | 0 | 1 | 1 | 1 | 7 |
| [78] Wu et al., 2012 | 1 | 0 | 1 | 0 | 0 | 0 | 1 | 1 | 1 | 1 | 6 |
| [77] X. Wang et al., 2020 | 1 | 1 | 1 | 0 | 0 | 1 | 0 | 0 | 1 | 1 | 6 |
| [79] Xie et al., 2018 | 1 | 1 | 0 | 0 | 0 | 1 | 1 | 1 | 1 | 1 | 7 |
| [80] Zedlitz et al., 2012 | 1 | 1 | 1 | 0 | 0 | 1 | 1 | 1 | 1 | 1 | 8 |
| [81] Zhang et al., 2021 | 1 | 0 | 1 | 0 | 0 | 0 | 1 | 1 | 1 | 1 | 6 |
| [84] Zhiyan et al., 2017 | 1 | 0 | 1 | 0 | 0 | 0 | 1 | 1 | 1 | 1 | 6 |

Notes: The Physiotherapy Evidence Database (PEDro) scale consists of 10 items: item 1: random allocation; item 2: concealment of allocation; item 3: baseline equivalence; item 4: blinding procedure (subjects); item 5: blinding procedure (therapists); item 6: blinding procedure (assessors); item 7: intention to treat analysis; item 8: adequate follow-up; item 9: between-group statistical analysis item 10: measurement of data variability and point estimates.
