# Supplementary material for: The effect of mind- and body-based interventions on poststroke depression and its neural mechanisms: A systematic review and meta-analysis
Source: Research Square preprint supplement (doi:10.21203/rs.3.rs-5954227/v1), 2025-02-19
Supplement: Supplementary file 5 [file c2e3f2f8482c6faa3c505926.docx]

Table 2: Description of the participants and the intervention.

| **Author/year** | **Intervention (IG)** | **Comparison group (CG)** | **Sample size at baseline** | **Mean age (SD) and/or age range (years)** | **Gender (M/F)** | **Frequency and duration per session** | **Intervention period** | **Follow-up (fup)** |
| --- | --- | --- | --- | --- | --- | --- | --- | --- |
| **Mind-based interventions** | | | | | | | | |
| [19] Golding et al., 2018 | Self-help relaxation training | Waitlist (receiving intervention after 3-month) | N= 20 (IG: 10, CG: 10) | IG: 67.8 (7.480)  CG: 62.4 (8.356) | IG: 6/4  CG: 5/5 | IG and CG: Five sessions per week, 20 times in total | 4 weeks | 12-month fup |
| [17] Baldo et al., 2021 | Mindfulness-Based Stress Reduction | Brain Health class | N=32 (IG: 16, CG: 16) | IG: 64.8 (12.0)  CG: 67.3 (9.5) | IG: 11/5  CG: 11/5 | IG and CG : One session per week, 8 sessions in total (2.5h/session) | 8 weeks | 3-month fup |
| [18] Duan et al., 2023 | IG1: Active rTMS and MBSR  IG2: Sham rTMS and MBSR | Sham rTMS  and general psychological care | N= 71 (IG1: 23 IG2: 24, CG: 24) | IG1: 58.30 (13.06)  IG2: 53.63 (13.01)  CG: 54.42 (14.27) | IG1: 19/4  IG2: 20/4  CG: 19/5 | rTMS: Daily session (five sessions per week), 20 sessions in total (4 weeks and 20min/session)  MBSR: One session per week, six sessions in total (six weeks and 1h/session)  General psychological care: Same with MBSR | 4 weeks rTMS  6 weeks MBSR or general psychological care | 8-week fup |
| **Body-based interventions** | | | | | | | | |
| [25] Baskett et al., 1997 | Home guidance | Outpatient or day hospital therapy | N=100 (IG: 50, CG: 50) | IG: 67.8 (11.6)  CG: 71.7 (9.1) | IG: 30/20  CG: 27/23 | IG: One session per week, 12 sessions in total  CG: Two or three sessions per week, 24 - 36 sessions in total (5h/session) | 3 months | No fup |
| [61] Partridge et al., 2000 | Double amount of 60 minutes’ physiotherapy | Standard amount of 30 minutes’  physiotherapy | N= 114 (IG: 60, CG: 54) | 76.5 years (range 60–94 years) | 52/62 | IG: One session per day (60min/session)  CG: One session per day (30min/session) | 6 months | No fup |
| [39] Green et al., 2002 | Community physiotherapy | No treatment | N= 170 (IG: 85, CG: 85) | IG: 71.5 (8.7)  CG: 73.5 (8.3) | IG: 49/36  CG: 46/39 | IG: A standard maximum contact period of 13 weeks with a  minimum of three contacts per patient | Maximum 13 weeks | 6- month fup |
| [49] Lai et al., 2006 | Home-based physical exercise program | Usual care | N=100 (IG: 50, CG: 50) | IG: 68.5 (9.0  CG: 70.4 (11.3 | IG: 23/21  CG: 27/22 | IG: Three sessions per week, 36 sessions in total | 12 weeks | 6-month fup |
| [55] Mead et al., 2007 | Starting with a warm-up, then doing endurance and resistance training | Relaxation (attention control) | N= 66 (IG: 32, CG: 34) | IG: 72.0 (10.4)  CG: 71.7 (9.6) | IG: 18/14  CG: 18/16 | IG: Three sessions per week, 36 sessions in total (1h15min/session)  CG: Three sessions per week, 36 sessions in total (duration increase from 20min to 49min/session) | 12 weeks | 4-month fup |
| [52] Lennon et al., 2008 | Aerobic exercise | Usual  care (without aerobic exercise) | N= 48 (IG: 24, CG: 24) | IG: 59.0 (10.3)  CG: 60.5 (10.0) | IG: 14/10  CG: 14/10 | IG: Two sessions per week, 16 training sessions two stress-management sessions in total (30min/session) | 10 weeks | No fup |
| [56] Morris et al., 2008 | Bilateral upper-limb task training | Unilateral upper-limb task training (followed the same program as the bilateral training group but used the paretic upper limb only) | N= 106 (IG: 56, CG: 50) | IG: 67.9 (13.1)  CG: 67.8 (9.9) | IG: 34/22  CG: 27/23 | IG and CG:  In hospital: Five sessions per week (20min/session)  Discharge home: Two home training per week (30min/session) | 6 weeks | 12-week fup |
| [66] Smith & Thompson, 2008 | Treadmill training | Weekly phone calls | N= 20 (IG: 10, CG: 10) | IG: 57.8 (7.0)  CG: 56 (8.3) | IG: 8/2  CG: 4/6 | IG: Three sessions per week, 12 sessions in total (20min/session) | 4 weeks | 6-week fup |
| [65] Sims et al., 2009 | Community-based progressive resistance training program | Usual care | N= 45 (IG: 23, CG: 22) | IG: 67.95 (14.76)  CG: 66.27 (16.01) | IG: 14/9  CG: 13/9 | IG: Two sessions per week, 20 sessions in total | 10 weeks | 6-month fup |
| [40] Holmgren et al., 2010 | High-intensive exercise program | Group discussion | N= 34 (IG: 15, CG: 19) | IG: 77.7 (7.6)  CG: 79.2 (7.5) | IG: 9/6  CG: 12/7 | IG: Seven training sessions per week, 35 sessions in total + one educational session per week, 5 sessions in total (1h/educational session)  CG: One discussion per week, five sessions in total (1h/session) | 5 weeks | 6-month fup |
| [76] Wang et al., 2010 * | Tai Chi | Rehabilitation | N= 34 (IG: 17, CG: 17) | IG: 76.53 (9.74)  CG: 77.59 (12.33) | IG: 30.8% males  CG: 23.5% males | IG: Weekly sessions, 12 sessions in total (50min/session)  CG: Weekly sessions, 12 sessions in total (80min/session) | 12 weeks | No fup |
| [53] Lund et al., 2012 | Lifestyle course +  physical activity | Physical activity | N= 99 (IG: 48, CG: 51) | IG: 75 (7.2)  CG: 79 (6.5) | IG: 22/17  CG: 20/27 | IG: One lifestyle session and one physical activity session per week, 36 + 36 sessions in total (2h lifestyle class+ 30min to 1h activity /session)  CG: One physical activity session/week, 36 sessions in total (30min to 1h/session) | 9 months | No fup |
| [29] Chaiyawat & Kulkantrakorn, 2012 | Home rehabilitation program | Standard care | N=60 (IG: 30, CG: 30) | IG: 67 (10)  CG: 66 (11) | IG: 14/16  CG: 13/17 | IG: One session per month, 6 sessions in total (about 60min/session) | 6 months | 2-year fup |
| [30] Chan et al., 2012* | Hatha  yoga component, modified  asana practice and pranayama practice combined with resistance and cardiovascular exercise | Exercise | N=14 (IG: 8,  CG: 6) | IG: 67.1 (15.4)  CG: 71.7 (12.7) | IG: 7/1  CG: 5/1 | IG: One yoga session per week, 6 sessions in total (90min/session) + 24 home practice sessions (40min/session) + exercise classes (50min/class)  CG: One exercises class per week, 6 classes in total (50min/class) | 6 weeks | No fup |
| [74] Van De Port et al., 2012 | Circuit training:  Eight different workstations in a gym and was intended to improve  performance in tasks relating to walking competency | Usual outpatient physiotherapy | N= 250 (IG: 126, CG: 124) | IG: 56 (10)  CG: 58 (10) | IG: 82/44  CG: 80/44 | IG: Two sessions per week, 24 sessions in total (90min/session) | 12 weeks | 12-week fup |
| [78] Wu et al., 2012 | Psychological intervention and rehabilitation training | Usual care | N= 120 (IG: 60, CG: 60) | IG: 56.10 (1.06)  CG: 56.70 (0.98) | IG: 30/30  CG: 32/28 | IG: Five psychological therapy sessions per week (20min/session) + Two rehabilitation training sessions per day (30min) | 21 days | 69-day fup |
| [80] Zedlitz et al., 2012 | Cognitive therapy with graded activity training | Cognitive therapy | N= 83 (IG: 38, CG: 45) | IG: 55.6 (8.8)  CG: 54.8 (9.1) | IG: 21/17  CG: 22/23 | IG: CG + Two exercise sessions per week, 24 sessions in total (2h/session)  CG: one cognitive therapy session, 12 sessions in total (2h/session) | 12 weeks | 6-month fup |
| [28] Byl et al., 2013 | Robot-assisted upper limb virtual task specific training, using UL-EX07 exoskeleton  IG1: Unilateral  IG2: Bilateral | Upper limb task specific repetitive training  guided by a physical therapist | N= 15 (IG1: 5, IG2: 5, CG: 5) | IG1: 54.2 (20.5)  IG2: 65.2 (5.4)  CG: 59.3 (6.8) | IG1: 4/1  IG1: 5/0  CG: 3/2 | IG1, IG2 and CG: Two sessions per week, 12 sessions in total (90min/session) | 6 weeks | No fup |
| [42] Immink et al., 2014 * | Yoga | Wait list | N= 25 (IG: 12, CG: 13) | IG: 56.1 (13.6)  CG: 63.2 (17.4) | IG: 6/5  CG: 3/8 | IG: One group session per week, 10 group sessions in total (90min/session) + six individual home practice session per week, 60 sessions in total (40min/session) | 10 weeks | No fup |
| [44] Kirk et al., 2014 * | Cardiac rehabilitation programme consisting of weekly exercise, education classes, and relaxation at the end | Standard care. | N= 24 (IG: 12, CG: 12) | IG: 67.5 (11.4)  CG: 66.8 (7.3) | IG: 9/3  CG: 10/2 | IG:  6 weeks: Community-based exercise and education programme  (health check + 1h exercise + 1h education + 10min relaxation/session)  2 weeks: 12-session exercise prescription course | 8 weeks | No fup |
| [70] Taylor-Piliae et al., 2014* | IG1: Taichi Yang style 24-posture short-form  IG2: Strength and range of movement exercises | Usual care | N= 145 (IG1: 53, IG2: 44, CG: 48) | IG1: 71.5 (10.3)  IG2: 69.6 (9.4)  CG: 68.2 (10.3) | IG1: 34/19  IG2: 20/24  CG: 23/25 | IG1 and IG2: Three sessions per week, 36 sessions in total (1h/session) | 12 weeks | No fup |
| [36] Faulkner et al., 2015 | Exercise  and education programme | Usual care | N= 60 (IG: 30, CG: 30) | IG: 65 (11  CG: 68 (10 | IG: 15/12  CG: 14/14 | IG: Two sessions per week, 16 sessions in total (90min/session) | 8 weeks | 4-month fup |
| [54] Mayo et al., 2015 | A group-based  intervention that included exercise and project-based activities promoting learning, leisure, and  social activities, done as individuals and in groups. | Waitlist | N= 186 (IG: 93, CG: 93) | IG: 61 (12)  CG: 65 (11) | IG: 57/36  CG: 56/37 | IG: Two sessions per week, 96 sessions in total (3h/session) (include 45min exercise/session) | 12 months | 3-month fup |
| [64] Shin et al., 2015 | Virtual reality combined with occupational therapy | Occupational therapy | N= 35 (IG: 18, CG: 17) | IG: 53.3 (11.8)  CG: 54.6 (13.4 ) | IG: 11/5  CG: 13/3 | IG and CG: Five sessions per week, 20 sessions in total (1h/session: 30min for virtual reality and 30min for occupational therapy in IG) | 4 weeks | No fup |
| [72] Topcuoglu et al., 2015 | Upper extremity aerobic exercise and conventional physiotherapy | Conventional physiotherapy | N= 40 (IG: 20, CG: 20) | IG: 65.95 (8.7)  CG: 67.5 (11.2) | IG: 11/9  CG: 11/9 | IG1: Five sessions per week, 20 sessions in total (30min/session) | 4 weeks | No fup |
| [46] Kongkasuwan et al., 2016* | Creative art therapy (meditation with music, warm-up activity,  main activity and group singing activity, ending  with a group-healing circle) and conventional physical therapy | Conventional physical therapy | N= 118 (IG: 59, CG: 59) | IG: 67.1 (9.2)  CG: 65.5 (9.9) | IG: 27/32  CG: 28/31 | IG: Two sessions per week, 8 sessions in total (1.5 - 2h/session) + Conventional physical program  CG: Conventional physical program: 20 sessions per week, 80 sessions in total (15min - 30min/session) | 4 weeks | No fup |
| [62] Renner et al., 2016 | Group therapy task training | Individual task training | N= 73 (IG: 34, CG: 39) | IG: 56 (10)  CG: 55 (10) | IG: 22/12  CG: 29/10 | IG and CG: Five sessions per week, 30 sessions in total (90min/session) | 6 weeks | 18-week fup |
| [32] Colledge et al., 2017 | IG1 moderate aerobic exercise training on aneurysmal subarachnoid haemorrhage (aSAH) patients  IG2 moderate aerobic exercise training on Meningioma patients | Moderate aerobic exercise training on Healthy subjects | N= 48 (IG1: 15, IG2: 16, CG: 17) | 58.5 (12.4)  IG1: 57.3 (8.9)  IG2: 59.3 (15.7)  CG: 57.5 (12.4) | 18/30  IG1: 4/11  IG2: 8/8  CG: 6/11 | IG1, IG2 and CG: Three to five sessions per week, 36 - 60 sessions in total (30 - 45min/session) | 12 weeks | 6-month fup |
| [63] Rowe et al., 2017 | High levels of robotic assistance during finger training | Low levels of robotic assistance during finger training | N= 30 (IG: 15, CG: 15) | 57 (13 )  IG: 56 (11)  CG: 60 (15) | 20/10  IG: 9/6  CG: 11/4 | IG and CG: Three sessions per week, 9 sessions in total (1h/session)3 hours per week, 9 hours in total | 3 weeks | 1-month fup |
| [73] Vahlberg et al., 2017 | Progressive  resistance and balance exercise program + motivational group discussions | Encouraged to continue their regular activities and were not  restricted from participating in ordinary physical activities and  rehabilitation programs | N= 67 (IG: 34, CG: 33) | IG: 72.6 (5.5) CG: 73.7 (5.3) | IG: 27/7  CG: 24/9 | IG: Two sessions per week, 24 sessions in total (1h exercise + 20min motivational discussion/session) | 12 weeks | 1-year fup |
| [84] Zhiyan et al., 2017 | A recovery guidance exercise combined with functional training within the recovery empty period | A recovery guidance exercise | N= 72 (IG: 36, CG: 36) | IG: 57.2 (13.5)  CG: 56.8 (14.2) | IG: 21/15  CG: 20/16 | IG:  Functional training: Two times per day, 168 times in total (10 - 15min/time) + CG  CG:  Recovery guidance: Two times per day, 168 times in total (20 - 30min/time) | 12 weeks | No fup |
| [23] Aidar et al., 2018 | Aquatic exercise programs | Wait list | N=43 (IG: 22, CG: 21) | IG: 51.8 (8.5)  CG: 52.7 (6.7) | IG: 10/9  CG: 9/8 | CG: Two sessions per week, 24 sessions in total (45 - 60 min/session) | 12 weeks | No fup |
| [79] Xie et al., 2018* | Tai Chi Yunshou exercise | Balance rehabilitation training | N= 244 (IG: 120, CG: 124) | IG: 60.9 (8.7)  CG: 60.1 (8.6) | IG: 83/37  CG: 99/25 | IG and CG: Five times per week, 60 times in total (60min/time) | 12 weeks | 12-week fup |
| [20] Adomavičienė et al., 2019 | Robot-assisted trainings | Virtual reality kinect-based system trainings | N= 42 (IG: 17, CG: 25) | 64.6 (4.2)  IG: 66 (60.5–70)  CG: 62 (61–69) | 28/14  IG: 11/6 CG: 17/8 | CG and IG: Five sessions per week, 10 sessions in total (45min/session) | 2 weeks | No fup |
| [41] Ihle-Hansen et al., 2019  (35) | Home visits and Individualized coaching by physiotherapists | Usual care | N= 380 (IG: 186, CG: 194) | IG: 71.4 (11.3)  CG: 72.0 (11.3) | IG: 99/78  CG: 120/65 | IG: One meeting per month, 18 meetings in total (11 face-to-face meeting, 7 phone meetings) | 18 months | No fup |
| [67] Steen Krawcyk et al., 2019 | Home-based high intensity interval training | Usual care | N= 71 (IG: 35, CG: 36) | IG: 63.7 (8.9)  CG: 63.7 (9.2) | IG: 23/8  CG: 26/6 | IG: Five times per week, 60 times in total (11min/time) (3 × 3 min training with 2 min of active recovery) | 12 weeks | No fup |
| [21] Aguiar et al., 2020 | Aerobic  treadmill training at 60-80% of heart rate reserve | Outdoor-overground walking below 40% of heart rate  reserve | N=22 (IG: 11, CG: 11) | IG: 52(11)  CG: 48(10) | 16/6  IG: 8/3 CG: 8/3 | CG and IG: Three sessions per week, 36 sessions in total (40min/session) | 12 weeks | 4-week fup |
| [24] Alıpsatıcı et al., 2020 | Treadmill training with increased speed | Treadmill  training with increased incline | N=28 (IG: 14, CG: 14) | 42.3 (12.4)  IG: 44.8 (12.33)  CG: 39.8 (12.35) | 17/11  IG: 8/6  CG: 9/5 | CG and IG: Three sessions per week, 24 sessions in total (30min/session) | 8 weeks | No fup |
| [31] Chippala & Sharma, 2020 | Very early  Mobilisation (within 24 hours of the onset of the stroke symptoms) | Standard  physiotherapy care (within 48hours following a stroke) | N=105 (IG: 52, CG: 53) | 61.03 (10.17)  IG: 59.08 (10.83)  CG: 63.02 (9.14) | 62/43  IG: 31/17  CG: 31/16 | IG: At least two sessions  a day (5 - 30min/session)+CG  CG: One session a day, 7 sessions in total (45min/session) | 7 days or until the discharge | 3-month fup |
| [33] De Luca et al., 2020 | Robotic gait training | Standard gait training | N= 30 (IG: 15, CG: 15) | IG: 54.4 (11.9)  CG: 55.8 (13.2) | IG: 11/4  CG: 11/4 | IG and CG: Three sessions per week, 24 sessions in total (1h/session) | 8 weeks | No fup |
| [45] Koch et al., 2020 | Combined aerobic, resistance, and cognitive training | Sham IG | N= 131 (IG: 86, CG: 45) | IG: 59 (11)  CG: 58 (12) | IG: 60/26  CG: 21/24 | IG and CG: Three sessions per week, 36 sessions in total  IG: 40 to 60min exercise training and 40min cognitive training/session  CG: 40min sham exercise and 40min sham cognitive training/session | 12 weeks | No fup |
| [47] Kotov et al., 2020 | Daily robot-assisted training using  MOTOmed bedside trainer and tablet PC technology for independent exercises | Standard  therapy | N= 100 (IG: 50, CG: 50) | IG: 65.02 (1.47)  CG: 64.8 (1.50) | IG: 30/20  CG: 31/19 | IG: Three sessions per day, 42 sessions in total (first session: no more than 7 min, increasing to 30-40min/session) + 4 to 6 sessions of independent exercises per day (20-30min/session) | 2 weeks | 6-month fup |
| [58] Pálsdóttir et al., 2020* | Nature-based rehabilitation | Standard care | N= 101 (IG: 51, CG: 50) | Mean (min–max)  IG: 67 (47–79)  CG: 66 (48–80) | IG: 24/27  CG: 17/33 | IG: Two sessions per week, 20 sessions in total (3.5h/session) | 10 weeks | 14-month fup (after randomization) |
| [60] Park et al., 2020 | Robot-assisted gait training and physical therapy | Conventional gait training and physical therapy | N= 14 (IG: 7, CG: 7) | IG: 69.86  CG: 76.29 | IG: 4/3  CG: 6/2 | IG and CG: Seven sessions per week, 14 sessions in total (60min physical therapy + 30min gait training/session) | 2 weeks | No fup |
| [77] X. Wang et al., 2020 | Mindfulness-based cognitive therapy | Stress management  education | N= 202 (IG: 101, CG: 101) | 59.93 (10.66) | 62/72 | IG and CG: One session per week, eight sessions in total (2h/session) | 8 weeks | No fup |
| [27] Busk et al., 2021 | Exercise with neuromuscular electrical stimulation of vastus medial and tibial muscles | Exercise therapy | N=50 (IG: 25, CG: 25) | Median (Q1-Q3)  IG: 68 (61-72)  CG: 72 (57-76) | IG: 15/10  CG: 15/10 | IG: Five exercise sessions with electrical stimulation per week, 10 sessions in total (10min/session)  CG: Five exercise sessions per week, 10 sessions in total (10min/session) | 2 weeks | 76-day fup |
| [34] De Rooij et al., 2021 | Virtual reality gait training | Conventional treadmill training and function gait exercises | N= 55 (IG: 28, CG: 27) | Median (25th–75th percentiles)  IG: 65 (57–70)  CG: 61 (53–71) | IG: 18/10  CG: 18/6 | IG and CG: Two sessions per week, 12 sessions in total (30min/session) | 6 weeks | 3-month fup |
| [38] Gjellesvik et al., 2021 | Treadmill high intensity interval training | Standard care | N= 70 (IG: 36, CG: 34) | IG: 57.6 (9.2)  CG: 58.7 (9.2) | IG: 21/15  20/14 | IG: Three sessions per week, 24 sessions in total (26min/session) | 8 weeks | 12-month fup |
| [81] Zhang et al., 2021 | Upper limb mirror therapy and regular occupational therapy | Regular occupational therapy | N= 60 (IG: 30, CG: 30) | IG: 57.0 (10.4)  CG: 59.9 (11.8) | IG: 15/15  CG: 18/12 | CG: Five OT sessions per week, 20 sessions in total (30min/session)  IG: Five OT+MIRROR sessions per week, 20 sessions in total (30min/session) | 4 weeks | No fup |
| [26] Brauer et al., 2022 | Treadmill training (40–60% heart rate reserve) and self-management  education | Usual gait  training | N=119 (IG: 60, CG: 59) | IG: 62 (11)  CG: 64 (9) | IG: 48/12  CG: 46/13 | IG: Three sessions (treadmill training and self-management education) per week, 24 sessions in total (30min treadmill training/session) + 2 usual gait sessions per week  CG: Five session per week, 40 sessions in total | 8 weeks | 18-week fup |
| [35] Deijle et al., 2022 | 1-year exercise  Program (a 12-week group exercise program + three physiotherapy counselling visits over 9 months) | Standard care | N=119 (IG: 60, CG: 59) | IG: 64.7 (8.9, range 44–86)  CG: 63.9 (10.6, range 44–85) | IG: 34/26  CG: 36/23 | IG: Two exercise sessions per week, 24 sessions in total (1h/session) (with Instruction: Three times home exercise per week) + three visits to physiotherapists over a 9-month period | 1 year  (12 weeks exercise program) | 1-year fup |
| [75] D. Wang et al., 2022 | IG1: Constraint induced movement therapy plus conventional rehabilitation training  IG2: Upper limb task-oriented training plus conventional rehabilitation training | Conventional rehabilitation training only | N= 84 (IG1: 28, IG2: 28, CG: 28) | IG1: 61.38 (10.15)  IG2: 60.12 (11.31)  CG: 61.72 (9.09) | IG1: 15/9  IG2: 18/8  CG: 16/9 | CG: Five sessions per week, 15 sessions in total (30min/session)  IG1: CG + Five sessions per week, 15 sessions in total (1h/session)  IG2: CG + Five sessions per week, 15 sessions in total (30min/session) | 3 weeks | No fup |
| [37] Ghaffari et al., 2022 | Vestibular rehabilitation | Standard rehabilitation | N= 32 (IG: 16, CG: 16) | IG: 58.27 (9.58)  CG: 61.61 (7.64) | 32/0 | IG and CG: Three sessions per week, 24 sessions in total (60min/session) | 8 weeks | No fup |
| [82] J. Zhao et al., 2022* | Sitting Tai Chi program | Hospital recommended upper limb movements | N= 160 (IG: 80, CG: 80) | IG: 62.61 (12.88)  CG: 63.35 (12.90) | IG: 42/38  CG: 39/41 | IG and CG: Three sessions per week, 36 sessions in total (40min/session) | 12 weeks | 4-week fup |
| [43] Kiper et al., 2022* | Immersive virtual therapy and exercises | Schultz’s Autogenic  Training (a desensitization-relaxation technique) and exercises | N= 60 (IG: 30, CG: 30) | IG: 65.50 (6.72)  CG: 65.57 (4.99) | IG: 13/17  CG: 17/13 | IG and CG: Ten sessions in total  (80min/session) | 3 weeks | 3-week fup |
| [83] L. Zhao et al., 2022 | Musicokinetic therapy: exercise with background music (the same type of ambient pure music from Bandari) | Exercise  therapy | N= 65 (IG: 32, CG: 33) | 81.14 (8.33) | 28/37 | CG: 14 sessions per week, 112 sessions in total (30min/session)  IG: CG with music | 8 weeks | No fup |
| [57] Nindorera et al., 2023 | 12-week Circuit walking, balance, cycling  and strength training  Crossover  12-week sociocultural activities | 12-week sociocultural activities  Crossover  12-week Circuit walking, balance, cycling  and strength training | N= 46 (IG: 23, CG: 23) | IG: 50.9 (10.7)  CG: 50.1 (11.2) | IG: 18/5  CG: 18/5 | IG and CG: 3 times per week, 36 times in total (2h/time) | 12 weeks | 12-week fup |
| [59] Palumbo et al., 2022 | Music Upper Limb Therapy–  Integrated | Home exercise program | N= 25 (IG: 13, CG: 12) | IG: 61.23 (9.13)  CG: 61.75 (12.75) | IG: 5/8  CG: 8/4 | IG and CG: Two sessions per week, 12 sessions in total (45min/session) | 6 weeks | No fup |
| [68] Sun et al., 2022* | Traditional Chinese Yijinjing and Qigong exercise | Routine  segmental rehabilitation training | N= 60 (IG: 30, CG: 30) | IG: 62.03 (7.37)  CG: 65.23 (6.29) | IG: 17/13  CG: 17/13 | IG and CG: Daily sessions (seven sessions/week), 21 sessions in total (60min/session) | 3 weeks | 1-month fup |
| [69] Taravati et al., 2022 | Upper limb robotic training and conventional rehabilitation | Conventional rehabilitation | N= 45 (IG: 22, CG: 25) | IG: 50.94 (17.20)  CG: 55.75 (11.61) | IG: 14/3  CG: 14/6 | IG: Five sessions per week, 20 sessions in total (30 - 45min/session) | 4 weeks | No fup |
| [48] Krawcyk et al., 2023 | Home-based high intensity interval training | Usual care | N= 71 (IG: 35, CG: 36) | IG: 64.4 (8.5)  CG: 63.4 (9.2) | IG: 22/6  CG: 26/5 | IG: Five times per week, 60 times in total (15min/time) | 12 weeks | 12-month fup |
| [50] Lapointe et al., 2022 | IG1: High  intensity interval training only or combining it with moderate intensity continuous training  IG2: Moderate intensity continuous training | Usual care | N= 52 (IG1: 19, IG2: 16, CG: 17) | IG1: 71.8 (9.9)  IG2: 65.6 (11.3)  CG: 69.6 (10.7) | IG1: 13/6  IG2: 10/6  CG: 10/7 | IG1 and IG2: Three sessions per week, 72 sessions in total (30min/session) | 6 months | 6-month fup |
| [51] Lee et al., 2023 | Gait training on a sandy beach | Gait training on a  firm floor in an indoor facility | N= 28 (IG: 13, CG: 15) | IG: 65.15 (5.34)  CG: 67.07 (5.82) | IG: 9/4  CG: 13/2 | IG and CG: Two sessions per day, 10 sessions in total (30min/session) | 5 days | No fup |
| [71] Tollár et al., 2023 | IG1 and IG2: Non-immersive, high-intensity exergaming for 2 years | CG1 and CG2: No interventions | N= 558 (IG1: 143, IG2: 136, CG1: 143, CG2: 136) | No information | No information | IG: Three sessions per week (1h/session)  CG: Not train | 2 years | No fup |
| [22] Ahmed et al., 2024 | Low  load resistance training with blood flow restriction | High load resistance training | N=30 (IG: 15, CG: 15) | IG: 54.20 (13.19)  CG: 54.73 (14.08) | IG: 10/5  CG: 9/6 | CG and IG: Three sessions per week, 15 sessions in total (40min/session) | 5 weeks | No fup |
| **Combined mind and body-based interventions** | | | | | | | | |
| [76] Wang et al., 2010* | Tai Chi | Rehabilitation | N= 34 (IG: 17, CG: 17) | IG: 76.53 (9.74)  CG: 77.59 (12.33) | IG: 30.8% males  CG: 23.5% males | IG: Weekly sessions, 12 sessions in total (50min/session)  CG: Weekly sessions, 12 sessions in total (80min/session) | 12 weeks | No fup |
| [30] Chan et al., 2012* | Hatha  yoga component, modified  asana practice and pranayama practice combined with resistance and cardiovascular exercise | Exercise | N=14 (IG: 8,  CG: 6) | IG: 67.1 (15.4)  CG: 71.7 (12.7) | IG: 7/1  CG: 5/1 | IG: One yoga session per week, 6 sessions in total (90min/session) + daily home practice sessions (40min/session) + exercise classes (50min/class)  CG: One exercises class per week, 6 classes in total (50min/class) | 6 weeks | No fup |
| [42] Immink et al., 2014*  (36) | Yoga | Wait list | N= 22 (IG: 11,  CG: 11) | IG: 56.1 (13.6)  CG: 63.2 (17.4) | IG: 6/5  CG: 3/8 | IG: Ten weekly group sessions (90min/session) + six individual home practice session per week, 60 sessions in total (40min/session) | 10 weeks | No fup |
| [44] Kirk et al., 2014* | Cardiac rehabilitation programme consisting of weekly exercise, education classes, and relaxation at the end | Standard care | N= 24 (IG: 12, CG: 12) | IG: 67.5 (11.4)  CG: 66.8 (7.3) | IG: 9/3  CG: 10/2 | IG:  6 weeks: Community-based exercise and education programme  (health check + 1h exercise + 1h education + 10min relaxation/session)  2 weeks:12-session exercise prescription course | 8 weeks | No fup |
| [70] Taylor-Piliae et al., 2014* | IG1: Taichi Yang style 24-posture short-form  IG2: Strength and range of movement exercises | Usual care | N= 145 (IG1: 53, IG2: 44, CG: 48) | IG1: 71.5 (10.3)  IG2: 69.6 (9.4)  CG: 68.2 (10.3) | IG1: 34/19  IG2: 20/24  CG: 23/25 | IG1 and IG2: Three sessions per week, 36 sessions in total (1h/session) | 12 weeks | No fup |
| [46] Kongkasuwan et al., 2016* | Creative art therapy (meditation with music, warm-up activity,  main activity and group singing activity, ending  with a group-healing circle) and conventional physical therapy | Conventional physical therapy | N= 118 (IG: 59, CG: 59) | IG: 67.1 (9.2)  CG: 65.5 (9.9) | IG: 27/32  CG: 28/31 | IG: Two sessions per week, 8 sessions in total (1.5 - 2h/session) + Conventional physical program  CG: Conventional physical program: 20 sessions per week, 80 sessions in total (15min - 30min/session) | 4 weeks | No fup |
| [79] Xie et al., 2018* | Tai Chi Yunshou exercise | Balance rehabilitation training | N= 244 (IG: 120, CG: 124) | IG: 60.9 (8.7)  CG: 60.1 (8.6) | IG: 83/37  CG: 99/25 | IG and CG: Five times per week, 60 times in total (60min/time) | 12 weeks | 12-week fup |
| [58] Pálsdóttir et al., 2020* | Nature-based rehabilitation | Standard care | N= 101 (IG: 51, CG: 50) | Mean (min–max)  IG: 67 (47–79)  CG: 66 (48–80) | IG: 24/27  CG: 17/33 | IG: Two sessions per week, 20 sessions in total (3.5h/session) | 10 weeks | 14-month fup (after randomization) |
| [82] J. Zhao et al., 2022* | Sitting Tai Chi program | Hospital recommended upper limb movements | N= 160 (IG: 80, CG: 80) | IG: 62.61 (12.88)  CG: 63.35 (12.90) | IG: 42/38CG: 39/41 | IG and CG: Three sessions per week, 36 sessions in total (40min/session) | 12 weeks | 4-week fup |
| [43] Kiper et al., 2022* | Immersive virtual therapy and exercises | Schultz’s Autogenic  Training (a desensitization-relaxation technique) and exercises | N= 60 (IG: 30, CG: 30) | IG: 65.50 (6.72)  CG: 65.57 (4.99) | IG: 13/17  CG: 17/13 | IG and CG: Ten sessions in total  (80min/session) | 3 weeks | 3-week fup |
| [68] Sun et al., 2022* | Traditional Chinese Yijinjing and Qigong exercise | Routine  segmental rehabilitation training | N= 60 (IG: 30, CG: 30) | IG: 62.03 (7.37)  CG: 65.23 (6.29) | IG: 17/13  CG: 17/13 | IG and CG: Daily sessions (seven sessions/week), 21 sessions in total (60min/session) | 3 weeks | 1-month fup |
